# Supplementary material for: Tubulin Beta-3 Chain as a New Candidate Protein Biomarker of Human Skin Aging: A Preliminary Study
Source: Oxid Med Cell Longev. 2017 May 23;2017:5140360. doi: 10.1155/2017/5140360 (PMC5463169; doi:10.1155/2017/5140360)
Supplement: Supplementary file 1 — Supplemental Table 1: Summary of the parameters applied for the bioinformatic analysis and results obtained. Supplemental Table 2. Protein identification (A and B) and relative quantitation (A) summary generated with isobar after combining Mascot and Protein Pilot reports from iTRAQ-based OFFGEL-LC-MALDI TOF/TOF analyses. The file contains 517 proteins that were identified and 446 proteins quantified, with the Accession / variants, Protein ID, Description, Gene name, Peptide Count (number of specific peptides), Spectral Count (number of specific spectra), Sequence Coverage and where applicable the Ratio [Elderly / Young], Log10 Ratio, and statistical values such as is Significant, P Value Ratio and P Value Sample. Protein expression level in elderly cells are normalized to protein expression level in young cells (iTRAQ ratio 117/113). [file 5140360.f1.xlsx]

## Sheet: Supplemental Table 1
Supplemental Table 1: Summary of the parameters applied for the bioinformatic analysis and results obtained
Parameters for peptides and proteins identification
	Analysis with Ppilot and Mascot
	Database: uniprot/Swissprot with variants
	Ppilot settings : Biological modifications
	Mascot settings: Precursor 50 ppm; MS/MS: 0.6 Da; Fixed modif: MMTS; variable modif: deamidation (NQ) Oxidation (M)
	Data merged at peptide level
	Global FDR: 1% (protein level)
	Peptide confidence >=95%
	Mascot score >30
Number of validated peptides identified
	# peptides identified: 57339 (with variants)
	# Peptides identified by Mascot: 54513
	# peptides identified by Ppilot: 13891
	# peptides identified by Mascot and Ppilot: 11065
Parameters and results of the annalysis with the isobar R package
	Isobar for statistical analysis using a Normal fit model
	# protein identified: 517 (groups of proteins)
	# proteins identified and quantified: 446
	# proteins identified not quantified: 71
	# Dysregulated protéins: 58
	# Upregulated proteins (Elderly vs Young): 18
	# Downregulated proteins (Elderly vs Young): 40
