# Supplementary material for: Tubulin Beta-3 Chain as a New Candidate Protein Biomarker of Human Skin Aging: A Preliminary Study
Source: Oxid Med Cell Longev. 2017 May 23;2017:5140360. doi: 10.1155/2017/5140360 (PMC5463169; doi:10.1155/2017/5140360)
Supplement: Supplementary file 2 [file 5140360.f2.xlsx]

## Sheet: Supplemental Table 2
Supplemental Table 2. Protein identification (A and B) and relative quantitation (A) summary generated with isobar after combining Mascot and Protein Pilot reports from iTRAQ-based OFFGEL-LC-MALDI TOF/TOF analyses. The file contains 517 proteins that were identified and 446 proteins quantified, with the Accession / variants, Protein ID, Description, Gene name, Peptide Count (number of specific pe…
A) Proteins identified with quantitative data
Accession / variants	ID	Description	Gene	Peptide Count	Spectral Count	Sequence Coverage	Ratio [Elderly / Young]	Is Significant	p-value Ratio	p-value Sample	Log10 Ratio
O60814	H2B1K_HUMAN	Histone H2B type 1-K	HIST1H2BK	9	131	4.76	0.170	1	6.27E-05	4.36E-19	-0.769
O75334-[2-6]	LIPA2_HUMAN	Liprin-alpha-2	PPFIA2	2	2	0.64	0.295	1	3.83E-02	5.16E-10	-0.531
P20674	COX5A_HUMAN	Cytochrome c oxidase subunit 5A, mitochondrial	COX5A	2	3	9.33	0.309	1	1.56E-02	2.23E-09	-0.510
P04732	MT1E_HUMAN	Metallothionein-1E	MT1E	1	9	16.39	0.310	1	7.22E-13	2.40E-09	-0.509
P05023-[3,4], P13637-[2,3]	AT1A1_HUMAN, AT1A3_HUMAN	Sodium/potassium-transporting ATPase subunit alpha-1, Sodium/potassium-transporting ATPase subunit alpha-3	ATP1A1, ATP1A3	2	2	0.69	0.321	0	5.63E-02	6.77E-09	-0.494
P05204	HMGN2_HUMAN	Non-histone chromosomal protein HMG-17	HMGN2	4	11	8.89	0.330	1	1.89E-02	1.50E-08	-0.482
Q15075	EEA1_HUMAN	Early endosome antigen 1	EEA1	2	3	0.64	0.331	1	1.71E-02	1.61E-08	-0.481
P07919	QCR6_HUMAN	Cytochrome b-c1 complex subunit 6, mitochondrial	UQCRH	1	1	19.78	0.335	0	5.81E-02	2.35E-08	-0.475
Q9UKY7-[2]	CDV3_HUMAN	Protein CDV3 homolog	CDV3	3	16	11.63	0.342	1	1.18E-03	4.11E-08	-0.466
O60925	PFD1_HUMAN	Prefoldin subunit 1	PFDN1	1	1	9.02	0.342	0	6.31E-02	4.18E-08	-0.466
O75152	ZC11A_HUMAN	Zinc finger CCCH domain-containing protein 11A	ZC3H11A	1	1	1.48	0.349	1	2.87E-02	7.18E-08	-0.457
P17096	HMGA1_HUMAN	High mobility group protein HMG-I/HMG-Y	HMGA1	1	19	7.48	0.352	1	1.56E-02	8.83E-08	-0.454
P06454-[2]	PTMA_HUMAN	Prothymosin alpha [Cleaved into: Prothymosin alpha, N-terminally processed; Thymosin alpha-1]	PTMA	5	24	12.61	0.357	1	4.01E-02	1.34E-07	-0.447
Q8NC51-[3]	PAIRB_HUMAN	Plasminogen activator inhibitor 1 RNA-binding protein	SERBP1	11	90	4.66	0.361	1	1.56E-02	1.82E-07	-0.442
Q13442	HAP28_HUMAN	28 kDa heat- and acid-stable phosphoprotein	PDAP1	1	1	7.18	0.363	1	1.23E-02	2.09E-07	-0.440
P63313	TYB10_HUMAN	Thymosin beta-10	TMSB10	2	35	13.64	0.364	1	1.30E-02	2.21E-07	-0.439
Q14103-[2-4]	HNRPD_HUMAN	Heterogeneous nuclear ribonucleoprotein D0	HNRNPD	1	1	2.54	0.369	0	7.38E-02	3.15E-07	-0.433
P67809	YBOX1_HUMAN	Nuclease-sensitive element-binding protein 1	YBX1	9	86	1.85	0.374	0	5.11E-02	4.31E-07	-0.428
O00233	PSMD9_HUMAN	26S proteasome non-ATPase regulatory subunit 9	PSMD9	1	6	5.38	0.383	1	2.34E-04	8.33E-07	-0.416
P67936-2	TPM4_HUMAN	Tropomyosin alpha-4 chain	TPM4	2	3	3.23	0.384	0	1.57E-01	8.56E-07	-0.416
P05114	HMGN1_HUMAN	Non-histone chromosomal protein HMG-14	HMGN1	3	13	8.00	0.384	1	1.20E-02	8.80E-07	-0.415
P62158	CALM_HUMAN	Calmodulin	CALM1	10	147	8.72	0.385	1	2.89E-02	9.13E-07	-0.415
P02795, P13640-[2], P80297	MT1G_HUMAN, MT1X_HUMAN, MT2_HUMAN	Metallothionein-1G, Metallothionein-1X, Metallothionein-2	MT1G, MT1X, MT2A	1	20	16.29	0.392	1	3.61E-03	1.47E-06	-0.406
P25398	RS12_HUMAN	40S ribosomal protein S12	RPS12	1	2	6.82	0.394	0	5.62E-02	1.63E-06	-0.405
P67936	TPM4_HUMAN	Tropomyosin alpha-4 chain	TPM4	5	48	3.23	0.401	1	3.64E-02	2.51E-06	-0.397
P22528	SPR1B_HUMAN	Cornifin-B	SPRR1B	4	56	8.99	0.405	1	2.54E-02	3.18E-06	-0.392
Q92538-[2,3]	GBF1_HUMAN	Golgi-specific brefeldin A-resistance guanine nucleotide exchange factor 1	GBF1	1	1	0.32	0.406	1	4.48E-02	3.34E-06	-0.391
O43768-[2-4,9]	ENSA_HUMAN	Alpha-endosulfine	ENSA	2	7	11.57	0.412	0	8.46E-02	4.71E-06	-0.385
P51858	HDGF_HUMAN	Hepatoma-derived growth factor	HDGF	4	12	3.75	0.429	1	2.37E-02	1.17E-05	-0.368
Q9Y2S6	TMA7_HUMAN	Translation machinery-associated protein 7	TMA7	2	7	9.38	0.439	0	1.77E-01	1.96E-05	-0.357
P35908	K22E_HUMAN	Keratin, type II cytoskeletal 2 epidermal	KRT2	2	3	1.10	0.443	0	9.60E-02	2.41E-05	-0.353
P62979, P0CG47, P0CG48, P62987	RL40_HUMAN, RS27A_HUMAN, UBB_HUMAN, UBC_HUMAN	Polyubiquitin-B [Cleaved into: Ubiquitin], Polyubiquitin-C [Cleaved into: Ubiquitin], Ubiquitin-40S ribosomal protein S27a, Ubiquitin-60S ribosomal protein L40	RPS27A, UBA52, UBB, UBC	9	170	3.45	0.447	0	9.12E-02	2.85E-05	-0.350
P61604	CH10_HUMAN	10 kDa heat shock protein, mitochondrial	HSPE1	12	121	7.84	0.455	1	2.20E-02	4.16E-05	-0.342
P07108-[2-5]	ACBP_HUMAN	Acyl-CoA-binding protein	DBI	4	50	9.20	0.460	1	1.86E-02	5.21E-05	-0.337
P16989-[2]	YBOX3_HUMAN	Y-box-binding protein 3	YBX3	4	8	1.61	0.460	0	7.66E-02	5.24E-05	-0.337
Q9C030-[2]	TRIM6_HUMAN	Tripartite motif-containing protein 6	TRIM6	2	8	1.23	0.463	1	1.10E-02	6.03E-05	-0.334
P20962	PTMS_HUMAN	Parathymosin	PTMS	4	11	8.82	0.468	1	1.44E-02	7.30E-05	-0.33
Q9GZP8	IMUP_HUMAN	Immortalization up-regulated protein	IMUP	3	5	9.43	0.476	1	8.05E-03	1.05E-04	-0.322
P26641	EF1G_HUMAN	Elongation factor 1-gamma	EEF1G	3	5	2.97	0.480	0	1.05E-01	1.24E-04	-0.319
P47914	RL29_HUMAN	60S ribosomal protein L29	RPL29	1	3	9.43	0.490	0	6.83E-02	1.79E-04	-0.310
Q9H299	SH3L3_HUMAN	SH3 domain-binding glutamic acid-rich-like protein 3	SH3BGRL3	3	36	10.75	0.490	1	1.62E-02	1.82E-04	-0.310
P62857	RS28_HUMAN	40S ribosomal protein S28	RPS28	3	20	17.39	0.491	1	9.21E-03	1.93E-04	-0.309
P16949-[2]	STMN1_HUMAN	Stathmin	STMN1	3	24	8.72	0.492	1	2.51E-02	2.00E-04	-0.308
Q14978-[2,3]	NOLC1_HUMAN	Nucleolar and coiled-body phosphoprotein 1	NOLC1	4	13	2.00	0.493	0	6.62E-02	2.05E-04	-0.307
Q7Z4V5-[2-4]	HDGR2_HUMAN	Hepatoma-derived growth factor-related protein 2	HDGFRP2	1	1	0.89	0.504	0	9.56E-02	3.11E-04	-0.297
P02765	FETUA_HUMAN	Alpha-2-HS-glycoprotein	AHSG	4	61	3.27	0.507	1	4.77E-02	3.38E-04	-0.295
Q05682-[3,5]	CALD1_HUMAN	Caldesmon	CALD1	17	65	1.13	0.509	0	9.35E-02	3.66E-04	-0.294
Q8NI22	MCFD2_HUMAN	Multiple coagulation factor deficiency protein 2	MCFD2	1	2	16.44	0.510	0	1.10E-01	3.87E-04	-0.292
O15212	PFD6_HUMAN	Prefoldin subunit 6	PFDN6	1	9	9.30	0.519	1	1.72E-02	5.20E-04	-0.285
P40429	RL13A_HUMAN	60S ribosomal protein L13a	RPL13A	2	14	2.96	0.519	0	1.78E-01	5.24E-04	-0.285
P05387	RLA2_HUMAN	60S acidic ribosomal protein P2	RPLP2	7	59	11.30	0.522	0	9.34E-02	5.84E-04	-0.282
P09493-[3,4,10]	TPM1_HUMAN	Tropomyosin alpha-1 chain	TPM1	3	17	2.11	0.527	0	2.04E-01	6.85E-04	-0.278
P52926	HMGA2_HUMAN	High mobility group protein HMGI-C	HMGA2	3	8	11.93	0.528	1	1.02E-04	7.07E-04	-0.277
P29966	MARCS_HUMAN	Myristoylated alanine-rich C-kinase substrate	MARCKS	5	20	5.42	0.534	0	1.31E-01	8.47E-04	-0.273
P61956	SUMO2_HUMAN	Small ubiquitin-related modifier 2	SUMO2	1	7	12.63	0.534	1	1.89E-02	8.65E-04	-0.272
P19971	TYPH_HUMAN	Thymidine phosphorylase	TYMP	1	1	3.11	0.537	0	1.61E-01	9.39E-04	-0.270
P27816-[6]	MAP4_HUMAN	Microtubule-associated protein 4	MAP4	17	67	0.78	0.542	0	1.18E-01	1.10E-03	-0.266
Q9UHV9	PFD2_HUMAN	Prefoldin subunit 2	PFDN2	1	5	9.09	0.544	1	1.81E-02	1.16E-03	-0.265
P62805	H4_HUMAN	Histone H4	HIST1H4A	7	129	9.71	0.545	0	6.71E-02	1.21E-03	-0.264
P07900	HS90A_HUMAN	Heat shock protein HSP 90-alpha	HSP90AA1	7	59	1.23	0.550	0	1.26E-01	1.41E-03	-0.260
Q96AE4-[2]	FUBP1_HUMAN	Far upstream element-binding protein 1	FUBP1	9	68	2.02	0.551	0	9.54E-02	1.45E-03	-0.259
P16144-[2-4]	ITB4_HUMAN	Integrin beta-4	ITGB4	4	4	0.38	0.560	0	1.73E-01	1.91E-03	-0.252
Q02543	RL18A_HUMAN	60S ribosomal protein L18a	RPL18A	2	6	3.98	0.562	0	3.20E-01	1.97E-03	-0.251
P20929-[2,3]	NEBU_HUMAN	Nebulin	NEB	4	4	0.13	0.563	1	5.23E-06	2.03E-03	-0.250
P09429	HMGB1_HUMAN	High mobility group protein B1	HMGB1	5	33	5.58	0.563	1	9.96E-07	2.07E-03	-0.249
P14314-[2]	GLU2B_HUMAN	Glucosidase 2 subunit beta	PRKCSH	9	63	2.08	0.570	0	8.07E-02	2.49E-03	-0.244
P01023	A2MG_HUMAN	Alpha-2-macroglobulin	A2M	1	1	0.68	0.571	0	1.97E-01	2.58E-03	-0.243
P23588-[2]	IF4B_HUMAN	Eukaryotic translation initiation factor 4B	EIF4B	6	15	1.47	0.573	0	1.76E-01	2.70E-03	-0.242
Q92611	EDEM1_HUMAN	ER degradation-enhancing alpha-mannosidase-like protein 1	EDEM1	1	7	1.22	0.573	0	2.58E-01	2.72E-03	-0.242
Q02818	NUCB1_HUMAN	Nucleobindin-1	NUCB1	6	28	2.82	0.576	0	1.04E-01	2.90E-03	-0.240
P06748	NPM_HUMAN	Nucleophosmin	NPM1	10	99	3.06	0.577	0	1.05E-01	2.98E-03	-0.239
P43487-[2]	RANG_HUMAN	Ran-specific GTPase-activating protein	RANBP1	4	8	11.44	0.580	0	2.49E-01	3.28E-03	-0.236
Q7KZ85	SPT6H_HUMAN	Transcription elongation factor SPT6	SUPT6H	3	18	0.41	0.581	0	8.33E-02	3.35E-03	-0.236
P62328	TYB4_HUMAN	Thymosin beta-4	TMSB4X	1	16	15.91	0.582	1	4.60E-03	3.41E-03	-0.235
Q15029-[2,3]	U5S1_HUMAN	116 kDa U5 small nuclear ribonucleoprotein component	EFTUD2	1	1	1.03	0.586	0	1.44E-01	3.76E-03	-0.232
Q09666	AHNK_HUMAN	Neuroblast differentiation-associated protein AHNAK	AHNAK	153	967	0.17	0.587	0	1.34E-01	3.89E-03	-0.231
O95817	BAG3_HUMAN	BAG family molecular chaperone regulator 3	BAG3	5	9	3.30	0.590	0	1.54E-01	4.14E-03	-0.230
P09497-[2]	CLCB_HUMAN	Clathrin light chain B	CLTB	7	24	3.49	0.593	1	1.87E-03	4.46E-03	-0.227
P19012	K1C15_HUMAN	Keratin, type I cytoskeletal 15	KRT15	1	1	1.97	0.597	0	1.39E-01	4.93E-03	-0.224
O43852-[3]	CALU_HUMAN	Calumenin	CALU	8	73	3.17	0.604	0	1.44E-01	5.81E-03	-0.219
Q02224-[2,3]	CENPE_HUMAN	Centromere-associated protein E	CENPE	3	8	0.33	0.611	0	1.26E-01	6.86E-03	-0.214
P36551	HEM6_HUMAN	Oxygen-dependent coproporphyrinogen-III oxidase, mitochondrial	CPOX	3	5	1.32	0.613	0	2.12E-01	7.28E-03	-0.212
Q15121	PEA15_HUMAN	Astrocytic phosphoprotein PEA-15	PEA15	1	1	9.23	0.622	0	1.47E-01	8.74E-03	-0.207
P06753-2	TPM3_HUMAN	Tropomyosin alpha-3 chain	TPM3	2	7	3.86	0.625	0	1.27E-01	9.39E-03	-0.204
P84103-[2]	SRSF3_HUMAN	Serine/arginine-rich splicing factor 3	SRSF3	3	18	4.88	0.633	0	1.84E-01	1.11E-02	-0.199
P54727	RD23B_HUMAN	UV excision repair protein RAD23 homolog B	RAD23B	6	79	2.20	0.635	0	1.23E-01	1.17E-02	-0.197
O00151	PDLI1_HUMAN	PDZ and LIM domain protein 1	PDLIM1	7	33	3.04	0.636	0	1.19E-01	1.18E-02	-0.197
P20810-[5,6,10]	ICAL_HUMAN	Calpastatin	CAST	21	100	2.12	0.638	0	1.38E-01	1.23E-02	-0.195
P63220	RS21_HUMAN	40S ribosomal protein S21	RPS21	5	45	10.84	0.640	0	1.99E-01	1.29E-02	-0.194
P00441	SODC_HUMAN	Superoxide dismutase [Cu-Zn]	SOD1	9	74	5.19	0.641	0	1.78E-01	1.30E-02	-0.194
O14737-[2]	PDCD5_HUMAN	Programmed cell death protein 5	PDCD5	3	30	10.40	0.643	0	2.25E-01	1.36E-02	-0.192
Q15056-[2]	IF4H_HUMAN	Eukaryotic translation initiation factor 4H	EIF4H	2	14	2.42	0.643	0	1.56E-01	1.37E-02	-0.192
P35749-[2-4]	MYH11_HUMAN	Myosin-11	MYH11	1	5	0.56	0.649	1	4.13E-02	1.53E-02	-0.188
Q16629-[2-4]	SRSF7_HUMAN	Serine/arginine-rich splicing factor 7	SRSF7	2	13	3.78	0.651	1	3.09E-02	1.59E-02	-0.187
P39019	RS19_HUMAN	40S ribosomal protein S19	RPS19	5	29	6.21	0.652	0	2.10E-01	1.62E-02	-0.186
P07476	INVO_HUMAN	Involucrin	IVL	1	2	2.39	0.654	0	9.99E-02	1.68E-02	-0.185
P18859	ATP5J_HUMAN	ATP synthase-coupling factor 6, mitochondrial	ATP5J	1	6	17.59	0.660	0	1.79E-01	1.91E-02	-0.180
P39687, Q92688-[2]	AN32A_HUMAN, AN32B_HUMAN	Acidic leucine-rich nuclear phosphoprotein 32 family member A, Acidic leucine-rich nuclear phosphoprotein 32 family member B	ANP32A, ANP32B	2	31	5.99	0.662	0	1.79E-01	1.96E-02	-0.179
Q9H910-[2,3]	HN1L_HUMAN	Hematological and neurological expressed 1-like protein	HN1L	5	26	7.37	0.664	0	1.72E-01	2.03E-02	-0.178
P02768	ALBU_HUMAN	Serum albumin	ALB	15	221	1.15	0.670	0	1.44E-01	2.26E-02	-0.174
Q8TBY8-[2,4]	PMFBP_HUMAN	Polyamine-modulated factor 1-binding protein 1	PMFBP1	3	4	0.59	0.671	0	2.04E-01	2.32E-02	-0.173
Q32MZ4-3	LRRF1_HUMAN	Leucine-rich repeat flightless-interacting protein 1	LRRFIP1	4	9	1.73	0.673	0	1.70E-01	2.41E-02	-0.172
Q9P2E9-[2]	RRBP1_HUMAN	Ribosome-binding protein 1	RRBP1	8	48	0.71	0.679	0	1.16E-01	2.67E-02	-0.168
P61313-[2]	RL15_HUMAN	60S ribosomal protein L15	RPL15	3	19	7.84	0.681	0	2.88E-01	2.73E-02	-0.167
Q04837	SSBP_HUMAN	Single-stranded DNA-binding protein, mitochondrial	SSBP1	3	29	10.14	0.681	0	2.30E-01	2.74E-02	-0.167
P63208	SKP1_HUMAN	S-phase kinase-associated protein 1	SKP1	1	5	7.36	0.686	0	2.77E-01	2.99E-02	-0.164
Q15847	ADIRF_HUMAN	Adipogenesis regulatory factor	ADIRF	2	12	18.42	0.686	0	5.92E-02	2.99E-02	-0.164
P80723	BASP1_HUMAN	Brain acid soluble protein 1	BASP1	6	22	4.41	0.686	0	2.20E-01	3.00E-02	-0.164
O15347	HMGB3_HUMAN	High mobility group protein B3	HMGB3	1	1	6.00	0.687	0	3.08E-01	3.02E-02	-0.163
Q9UII2	ATIF1_HUMAN	ATPase inhibitor, mitochondrial	ATPIF1	5	50	10.38	0.688	0	1.95E-01	3.07E-02	-0.163
P15586-[2]	GNS_HUMAN	N-acetylglucosamine-6-sulfatase	GNS	4	11	1.63	0.689	0	1.76E-01	3.14E-02	-0.162
P55209	NP1L1_HUMAN	Nucleosome assembly protein 1-like 1	NAP1L1	1	1	2.81	0.689	0	3.26E-01	3.15E-02	-0.162
O75145-[2]	LIPA3_HUMAN	Liprin-alpha-3	PPFIA3	1	6	0.59	0.699	0	3.50E-01	3.65E-02	-0.156
P99999	CYC_HUMAN	Cytochrome c	CYCS	5	21	6.67	0.703	0	1.51E-01	3.93E-02	-0.153
Q9C0C2	TB182_HUMAN	182 kDa tankyrase-1-binding protein	TNKS1BP1	14	65	0.81	0.705	0	2.15E-01	4.02E-02	-0.152
P20290	BTF3_HUMAN	Transcription factor BTF3	BTF3	1	24	10.68	0.710	0	1.65E-01	4.37E-02	-0.149
Q15149-[2-9]	PLEC_HUMAN	Plectin	PLEC	14	25	0.19	0.712	0	2.80E-01	4.48E-02	-0.148
O75347-[2]	TBCA_HUMAN	Tubulin-specific chaperone A	TBCA	4	30	7.41	0.712	0	2.04E-01	4.50E-02	-0.147
O60664-[4]	PLIN3_HUMAN	Perilipin-3	PLIN3	5	14	3.46	0.722	0	1.25E-01	5.20E-02	-0.141
O00515	LAD1_HUMAN	Ladinin-1	LAD1	6	51	1.35	0.723	0	1.88E-01	5.22E-02	-0.141
P06703	S10A6_HUMAN	Protein S100-A6	S100A6	7	105	10.00	0.727	0	2.76E-01	5.55E-02	-0.139
Q14764	MVP_HUMAN	Major vault protein	MVP	5	6	0.67	0.730	0	2.08E-01	5.77E-02	-0.137
P27482	CALL3_HUMAN	Calmodulin-like protein 3	CALML3	1	2	6.71	0.732	0	1.67E-01	5.96E-02	-0.135
P49720	PSB3_HUMAN	Proteasome subunit beta type-3	PSMB3	1	23	8.78	0.735	0	2.74E-01	6.19E-02	-0.134
P25789	PSA4_HUMAN	Proteasome subunit alpha type-4	PSMA4	4	21	9.20	0.737	0	3.14E-01	6.34E-02	-0.133
P60660-[2]	MYL6_HUMAN	Myosin light polypeptide 6	MYL6	9	151	7.28	0.740	0	2.48E-01	6.65E-02	-0.131
P14174	MIF_HUMAN	Macrophage migration inhibitory factor	MIF	5	89	7.83	0.741	0	7.30E-02	6.71E-02	-0.130
P23246	SFPQ_HUMAN	Splicing factor, proline- and glutamine-rich	SFPQ	1	1	2.12	0.742	0	2.52E-01	6.80E-02	-0.130
Q14019	COTL1_HUMAN	Coactosin-like protein	COTL1	4	20	4.93	0.750	0	2.95E-01	7.51E-02	-0.125
Q8IVF2-[3]	AHNK2_HUMAN	Protein AHNAK2	AHNAK2	16	95	0.22	0.752	0	2.97E-01	7.72E-02	-0.124
P62714, P67775	PP2AA_HUMAN, PP2AB_HUMAN	Serine/threonine-protein phosphatase 2A catalytic subunit alpha isoform, Serine/threonine-protein phosphatase 2A catalytic subunit beta isoform	PPP2CA, PPP2CB	4	31	3.56	0.754	0	2.45E-01	7.89E-02	-0.123
Q06323	PSME1_HUMAN	Proteasome activator complex subunit 1	PSME1	3	6	2.81	0.757	0	3.24E-01	8.16E-02	-0.121
P35579	MYH9_HUMAN	Myosin-9	MYH9	45	300	0.56	0.757	0	3.03E-01	8.26E-02	-0.121
P53999	TCP4_HUMAN	Activated RNA polymerase II transcriptional coactivator p15	SUB1	2	6	8.66	0.759	0	1.11E-01	8.43E-02	-0.120
P47755	CAZA2_HUMAN	F-actin-capping protein subunit alpha-2	CAPZA2	1	1	3.50	0.766	0	2.63E-01	9.09E-02	-0.116
Q03135	CAV1_HUMAN	Caveolin-1	CAV1	5	16	5.62	0.771	0	2.09E-01	9.74E-02	-0.113
P02533	K1C14_HUMAN	Keratin, type I cytoskeletal 14	KRT14	10	92	3.18	0.778	0	2.59E-01	1.04E-01	-0.109
P07602	SAP_HUMAN	Prosaposin	PSAP	6	43	1.53	0.789	0	1.85E-01	1.18E-01	-0.103
P30086	PEBP1_HUMAN	Phosphatidylethanolamine-binding protein 1	PEBP1	5	34	6.95	0.793	0	3.06E-01	1.23E-01	-0.101
P32320	CDD_HUMAN	Cytidine deaminase	CDA	2	40	13.70	0.798	0	2.88E-01	1.29E-01	-0.098
Q15843	NEDD8_HUMAN	NEDD8	NEDD8	3	8	7.41	0.798	0	2.99E-01	1.30E-01	-0.098
Q96AT9	RPE_HUMAN	Ribulose-phosphate 3-epimerase	RPE	1	1	8.33	0.810	0	3.62E-01	1.46E-01	-0.092
Q14247	SRC8_HUMAN	Src substrate cortactin	CTTN	3	26	2.00	0.826	0	1.90E-01	1.70E-01	-0.083
P19367-3	HXK1_HUMAN	Hexokinase-1	HK1	1	6	1.64	0.827	0	2.88E-01	1.71E-01	-0.083
Q12905	ILF2_HUMAN	Interleukin enhancer-binding factor 2	ILF2	2	3	2.56	0.827	0	3.66E-01	1.71E-01	-0.083
Q9HCY8	S10AE_HUMAN	Protein S100-A14	S100A14	4	47	10.58	0.832	0	3.47E-01	1.79E-01	-0.080
P63244	GBLP_HUMAN	Guanine nucleotide-binding protein subunit beta-2-like 1	GNB2L1	2	2	6.31	0.832	0	3.47E-01	1.80E-01	-0.080
O60888	CUTA_HUMAN	Protein CutA	CUTA	3	20	15.08	0.834	0	3.62E-01	1.81E-01	-0.079
P13473-[2,3]	LAMP2_HUMAN	Lysosome-associated membrane glycoprotein 2	LAMP2	3	52	2.20	0.835	0	2.87E-01	1.84E-01	-0.078
P61026	RAB10_HUMAN	Ras-related protein Rab-10	RAB10	2	8	5.50	0.837	0	4.07E-01	1.86E-01	-0.078
Q92945	FUBP2_HUMAN	Far upstream element-binding protein 2	KHSRP	6	21	1.69	0.837	0	1.93E-01	1.87E-01	-0.077
E9PAV3-[2], Q13765	NACA_HUMAN, NACAM_HUMAN	Nascent polypeptide-associated complex subunit alpha, Nascent polypeptide-associated complex subunit alpha, muscle-specific form	NACA	2	14	2.43	0.842	0	3.93E-01	1.95E-01	-0.075
P17301	ITA2_HUMAN	Integrin alpha-2	ITGA2	3	10	0.68	0.846	0	3.23E-01	2.02E-01	-0.073
P25786-[2]	PSA1_HUMAN	Proteasome subunit alpha type-1	PSMA1	9	63	2.66	0.851	0	3.95E-01	2.10E-01	-0.070
P19623	SPEE_HUMAN	Spermidine synthase	SRM	1	1	3.31	0.857	0	3.77E-01	2.21E-01	-0.067
P09496-[2,5]	CLCA_HUMAN	Clathrin light chain A	CLTA	3	13	8.47	0.861	0	1.65E-01	2.28E-01	-0.065
P36957	ODO2_HUMAN	Dihydrolipoyllysine-residue succinyltransferase component of 2-oxoglutarate dehydrogenase complex, mitochondrial	DLST	7	9	1.55	0.862	0	4.17E-01	2.28E-01	-0.065
Q14697-[2]	GANAB_HUMAN	Neutral alpha-glucosidase AB	GANAB	4	11	1.17	0.863	0	3.47E-01	2.31E-01	-0.064
P52907	CAZA1_HUMAN	F-actin-capping protein subunit alpha-1	CAPZA1	3	19	3.50	0.863	0	4.29E-01	2.31E-01	-0.064
P62861	RS30_HUMAN	40S ribosomal protein S30	FAU	1	1	16.95	0.865	0	3.94E-01	2.35E-01	-0.063
P17931	LEG3_HUMAN	Galectin-3	LGALS3	3	24	2.80	0.866	0	3.92E-01	2.37E-01	-0.062
P28066	PSA5_HUMAN	Proteasome subunit alpha type-5	PSMA5	2	18	4.98	0.871	0	2.51E-01	2.45E-01	-0.060
O75531	BAF_HUMAN	Barrier-to-autointegration factor	BANF1	3	17	13.48	0.874	0	4.47E-01	2.50E-01	-0.059
P00491	PNPH_HUMAN	Purine nucleoside phosphorylase	PNP	6	46	6.23	0.875	0	3.82E-01	2.53E-01	-0.058
P22234-[2]	PUR6_HUMAN	Multifunctional protein ADE2 [Includes: Phosphoribosylaminoimidazole-succinocarboxamide synthase	PAICS	5	27	2.59	0.876	0	2.68E-01	2.54E-01	-0.058
Q13753	LAMC2_HUMAN	Laminin subunit gamma-2	LAMC2	1	1	1.09	0.877	0	4.16E-01	2.55E-01	-0.057
P55145	MANF_HUMAN	Mesencephalic astrocyte-derived neurotrophic factor	MANF	3	4	5.49	0.882	0	3.92E-01	2.65E-01	-0.055
P52272	HNRPM_HUMAN	Heterogeneous nuclear ribonucleoprotein M	HNRNPM	1	1	3.15	0.882	0	4.31E-01	2.66E-01	-0.054
P28074-[3]	PSB5_HUMAN	Proteasome subunit beta type-5	PSMB5	4	4	6.08	0.883	0	4.05E-01	2.67E-01	-0.054
P62269	RS18_HUMAN	40S ribosomal protein S18	RPS18	4	31	5.92	0.889	0	4.15E-01	2.78E-01	-0.051
Q96FQ6	S10AG_HUMAN	Protein S100-A16	S100A16	2	32	18.45	0.894	0	3.97E-01	2.88E-01	-0.049
P46781	RS9_HUMAN	40S ribosomal protein S9	RPS9	2	8	5.67	0.894	0	3.02E-01	2.88E-01	-0.049
P36873-[2]	PP1G_HUMAN	Serine/threonine-protein phosphatase PP1-gamma catalytic subunit	PPP1CC	1	2	5.57	0.902	0	4.19E-01	3.03E-01	-0.045
P22626-[2]	ROA2_HUMAN	Heterogeneous nuclear ribonucleoproteins A2/B1	HNRNPA2B1	4	6	4.53	0.902	0	3.04E-01	3.03E-01	-0.045
Q01518	CAP1_HUMAN	Adenylyl cyclase-associated protein 1	CAP1	3	14	2.11	0.905	0	4.11E-01	3.10E-01	-0.043
P53634	CATC_HUMAN	Dipeptidyl peptidase 1	CTSC	6	39	1.30	0.907	0	4.27E-01	3.12E-01	-0.043
P61970	NTF2_HUMAN	Nuclear transport factor 2	NUTF2	3	26	6.30	0.914	0	3.62E-01	3.27E-01	-0.039
P23381	SYWC_HUMAN	Tryptophan--tRNA ligase, cytoplasmic	WARS	4	32	3.40	0.914	0	4.16E-01	3.27E-01	-0.039
Q9Y490	TLN1_HUMAN	Talin-1	TLN1	2	5	0.55	0.920	0	3.80E-01	3.39E-01	-0.036
P63241-[2]	IF5A1_HUMAN	Eukaryotic translation initiation factor 5A-1	EIF5A	2	27	7.79	0.921	0	4.33E-01	3.41E-01	-0.036
Q13011	ECH1_HUMAN	Delta(3,5)-Delta(2,4)-dienoyl-CoA isomerase, mitochondrial	ECH1	3	5	3.05	0.924	0	4.34E-01	3.46E-01	-0.034
Q00325-2	MPCP_HUMAN	Phosphate carrier protein, mitochondrial	SLC25A3	1	1	2.21	0.935	0	4.48E-01	3.69E-01	-0.029
P62304	RUXE_HUMAN	Small nuclear ribonucleoprotein E	SNRPE	2	19	11.96	0.939	0	4.30E-01	3.76E-01	-0.028
P17900	SAP3_HUMAN	Ganglioside GM2 activator	GM2A	2	20	10.36	0.939	0	4.63E-01	3.77E-01	-0.027
Q9UHD9	UBQL2_HUMAN	Ubiquilin-2	UBQLN2	1	2	2.56	0.944	0	4.47E-01	3.86E-01	-0.025
P61160-[2]	ARP2_HUMAN	Actin-related protein 2	ACTR2	5	23	4.57	0.944	0	4.52E-01	3.86E-01	-0.025
P62942	FKB1A_HUMAN	Peptidyl-prolyl cis-trans isomerase FKBP1A	FKBP1A	2	30	12.96	0.946	0	4.45E-01	3.90E-01	-0.024
P16070-[3-8,10-14,16-18]	CD44_HUMAN	CD44 antigen	CD44	5	18	2.16	0.946	0	4.43E-01	3.91E-01	-0.024
Q02878	RL6_HUMAN	60S ribosomal protein L6	RPL6	3	35	5.21	0.955	0	4.55E-01	4.09E-01	-0.020
P49411	EFTU_HUMAN	Elongation factor Tu, mitochondrial	TUFM	2	2	1.33	0.966	0	4.78E-01	4.31E-01	-0.015
Q99832	TCPH_HUMAN	T-complex protein 1 subunit eta	CCT7	3	6	4.97	0.966	0	4.21E-01	4.31E-01	-0.015
P13647	K2C5_HUMAN	Keratin, type II cytoskeletal 5	KRT5	7	32	1.36	0.967	0	4.69E-01	4.33E-01	-0.015
P10599	THIO_HUMAN	Thioredoxin	TXN	7	103	8.57	0.968	0	4.74E-01	4.36E-01	-0.014
P62333	PRS10_HUMAN	26S protease regulatory subunit 10B	PSMC6	1	1	3.86	0.969	0	4.74E-01	4.37E-01	-0.014
P31946-[2]	1433B_HUMAN	14-3-3 protein beta/alpha	YWHAB	1	3	3.66	0.970	0	4.82E-01	4.39E-01	-0.013
P09651-[2,3]	ROA1_HUMAN	Heterogeneous nuclear ribonucleoprotein A1	HNRNPA1	5	21	5.38	0.973	0	4.59E-01	4.45E-01	-0.012
P60900	PSA6_HUMAN	Proteasome subunit alpha type-6	PSMA6	8	35	3.66	0.976	0	4.79E-01	4.52E-01	-0.010
P47756-2	CAPZB_HUMAN	F-actin-capping protein subunit beta	CAPZB	2	12	4.69	0.981	0	4.90E-01	4.61E-01	-0.009
P13987	CD59_HUMAN	CD59 glycoprotein	CD59	2	13	9.38	0.981	0	4.65E-01	4.62E-01	-0.008
P26038	MOES_HUMAN	Moesin	MSN	7	31	1.21	0.984	0	4.90E-01	4.69E-01	-0.007
P06733	ENOA_HUMAN	Alpha-enolase	ENO1	15	145	4.15	0.985	0	4.88E-01	4.70E-01	-0.007
P62937	PPIA_HUMAN	Peptidyl-prolyl cis-trans isomerase A	PPIA	12	172	6.67	0.998	0	4.99E-01	4.97E-01	-0.001
P07858	CATB_HUMAN	Cathepsin B	CTSB	8	46	2.95	0.999	0	4.99E-01	4.99E-01	<0.001
P02792	FRIL_HUMAN	Ferritin light chain	FTL	1	6	8.57	1.001	0	4.99E-01	4.98E-01	<0.001
P47985	UCRI_HUMAN	Cytochrome b-c1 complex subunit Rieske, mitochondrial	UQCRFS1	1	1	5.11	1.005	0	4.96E-01	4.90E-01	0.002
P30101	PDIA3_HUMAN	Protein disulfide-isomerase A3	PDIA3	9	51	2.77	1.006	0	4.95E-01	4.88E-01	0.003
O75390	CISY_HUMAN	Citrate synthase, mitochondrial	CS	3	6	1.72	1.007	0	4.94E-01	4.87E-01	0.003
P19105, O14950	ML12A_HUMAN, ML12B_HUMAN	Myosin regulatory light chain 12A, Myosin regulatory light chain 12B	MYL12A, MYL12B	3	29	5.83	1.009	0	4.90E-01	4.82E-01	0.004
P49327	FAS_HUMAN	Fatty acid synthase	FASN	14	49	0.48	1.010	0	4.92E-01	4.80E-01	0.004
O75369-[2,3,6,8,9]	FLNB_HUMAN	Filamin-B	FLNB	26	146	0.54	1.013	0	4.89E-01	4.74E-01	0.006
Q99497	PARK7_HUMAN	Protein deglycase DJ-1	PARK7	6	29	4.23	1.015	0	4.85E-01	4.71E-01	0.006
P04264	K2C1_HUMAN	Keratin, type II cytoskeletal 1	KRT1	4	24	1.86	1.019	0	4.85E-01	4.63E-01	0.008
Q9Y3U8	RL36_HUMAN	60S ribosomal protein L36	RPL36	2	8	10.48	1.023	0	4.69E-01	4.55E-01	0.010
P05556-[2-5]	ITB1_HUMAN	Integrin beta-1	ITGB1	2	7	2.13	1.024	0	4.87E-01	4.52E-01	0.011
Q9Y679-[2]	AUP1_HUMAN	Ancient ubiquitous protein 1	AUP1	1	1	2.52	1.025	0	4.76E-01	4.51E-01	0.011
P25788	PSA3_HUMAN	Proteasome subunit alpha type-3	PSMA3	1	3	5.49	1.029	0	4.86E-01	4.44E-01	0.012
P06702	S10A9_HUMAN	Protein S100-A9	S100A9	4	6	13.16	1.029	0	4.77E-01	4.43E-01	0.012
Q5VTE0	EF1A3_HUMAN	Putative elongation factor 1-alpha-like 3	EEF1A1P5	13	120	3.25	1.030	0	4.59E-01	4.42E-01	0.013
Q562R1	ACTBL_HUMAN	Beta-actin-like protein 2	ACTBL2	2	2	3.46	1.032	0	4.77E-01	4.38E-01	0.014
P61978-[2,3]	HNRPK_HUMAN	Heterogeneous nuclear ribonucleoprotein K	HNRNPK	2	4	2.38	1.032	0	4.48E-01	4.38E-01	0.014
P27348	1433T_HUMAN	14-3-3 protein theta	YWHAQ	2	7	5.71	1.032	0	4.78E-01	4.37E-01	0.014
P36578	RL4_HUMAN	60S ribosomal protein L4	RPL4	2	13	2.34	1.034	0	4.84E-01	4.33E-01	0.015
P42766	RL35_HUMAN	60S ribosomal protein L35	RPL35	1	1	7.32	1.034	0	4.69E-01	4.33E-01	0.015
P07384	CAN1_HUMAN	Calpain-1 catalytic subunit	CAPN1	10	25	0.98	1.038	0	4.57E-01	4.26E-01	0.016
P08962-[2,3]	CD63_HUMAN	CD63 antigen	CD63	3	20	2.52	1.041	0	4.42E-01	4.21E-01	0.017
Q9UK76-2	HN1_HUMAN	Hematological and neurological expressed 1 protein	HN1	1	4	15.58	1.041	0	4.50E-01	4.20E-01	0.018
P68036-3	UB2L3_HUMAN	Ubiquitin-conjugating enzyme E2 L3	UBE2L3	1	8	14.29	1.046	0	4.69E-01	4.11E-01	0.020
P31153	METK2_HUMAN	S-adenosylmethionine synthase isoform type-2	MAT2A	1	1	3.80	1.054	0	4.71E-01	3.96E-01	0.023
P50990-[2]	TCPQ_HUMAN	T-complex protein 1 subunit theta	CCT8	2	20	2.19	1.055	0	4.69E-01	3.94E-01	0.023
P31949	S10AB_HUMAN	Protein S100-A11	S100A11	7	127	8.57	1.056	0	4.31E-01	3.94E-01	0.024
Q14974	IMB1_HUMAN	Importin subunit beta-1	KPNB1	3	15	1.48	1.056	0	4.67E-01	3.93E-01	0.024
P23497-4	SP100_HUMAN	Nuclear autoantigen Sp-100	SP100	4	10	1.37	1.056	0	4.29E-01	3.93E-01	0.024
P37802-[2]	TAGL2_HUMAN	Transgelin-2	TAGLN2	12	127	5.53	1.057	0	4.38E-01	3.91E-01	0.024
B1AJZ9-[4]	FHAD1_HUMAN	Forkhead-associated domain-containing protein 1	FHAD1	3	3	0.57	1.060	0	4.36E-01	3.85E-01	0.025
P18206-[2]	VINC_HUMAN	Vinculin	VCL	7	52	0.88	1.062	0	4.56E-01	3.82E-01	0.026
P62318-2	SMD3_HUMAN	Small nuclear ribonucleoprotein Sm D3	SNRPD3	1	5	7.94	1.067	0	4.69E-01	3.72E-01	0.028
P52209-[2]	6PGD_HUMAN	6-phosphogluconate dehydrogenase, decarboxylating	PGD	3	3	3.52	1.068	0	4.59E-01	3.72E-01	0.028
P51149	RAB7A_HUMAN	Ras-related protein Rab-7a	RAB7A	3	35	4.83	1.075	0	4.51E-01	3.59E-01	0.031
P62701	RS4X_HUMAN	40S ribosomal protein S4, X isoform	RPS4X	3	8	3.80	1.079	0	4.28E-01	3.52E-01	0.033
P21333-[2]	FLNA_HUMAN	Filamin-A	FLNA	19	53	0.53	1.093	0	3.95E-01	3.28E-01	0.039
Q9NQC3-2	RTN4_HUMAN	Reticulon-4	RTN4	2	9	1.17	1.101	0	3.82E-01	3.16E-01	0.042
P50991	TCPD_HUMAN	T-complex protein 1 subunit delta	CCT4	4	14	5.38	1.101	0	4.35E-01	3.15E-01	0.042
P08758	ANXA5_HUMAN	Annexin A5	ANXA5	7	67	3.12	1.109	0	3.74E-01	3.03E-01	0.045
P0DME0, Q01105-[2-4]	SET_HUMAN, SETLP_HUMAN	Protein SET, Protein SETSIP	SET, SETSIP	3	8	4.26	1.109	0	2.94E-01	3.03E-01	0.045
P14625	ENPL_HUMAN	Endoplasmin	HSP90B1	22	126	1.99	1.110	0	4.20E-01	3.02E-01	0.045
P09622-[2,3]	DLDH_HUMAN	Dihydrolipoyl dehydrogenase, mitochondrial	DLD	2	12	2.75	1.110	0	2.61E-01	3.01E-01	0.045
P34932	HSP74_HUMAN	Heat shock 70 kDa protein 4	HSPA4	2	12	1.79	1.115	0	4.22E-01	2.94E-01	0.047
O43169	CYB5B_HUMAN	Cytochrome b5 type B	CYB5B	1	2	6.16	1.118	0	4.27E-01	2.89E-01	0.048
Q96AX1	VP33A_HUMAN	Vacuolar protein sorting-associated protein 33A	VPS33A	2	3	1.17	1.119	0	3.81E-01	2.87E-01	0.049
P25787	PSA2_HUMAN	Proteasome subunit alpha type-2	PSMA2	5	41	8.12	1.123	0	3.83E-01	2.82E-01	0.050
P69892	HBG2_HUMAN	Hemoglobin subunit gamma-2	HBG2	1	3	6.80	1.123	0	4.02E-01	2.81E-01	0.050
Q9BRA2	TXD17_HUMAN	Thioredoxin domain-containing protein 17	TXNDC17	3	9	6.50	1.123	0	2.93E-01	2.81E-01	0.050
P08238	HS90B_HUMAN	Heat shock protein HSP 90-beta	HSP90AB1	7	29	0.97	1.126	0	3.72E-01	2.77E-01	0.051
P08195-[2-4]	4F2_HUMAN	4F2 cell-surface antigen heavy chain	SLC3A2	9	49	3.33	1.128	0	4.23E-01	2.73E-01	0.053
P07996	TSP1_HUMAN	Thrombospondin-1	THBS1	11	89	0.60	1.129	0	4.10E-01	2.73E-01	0.053
P17987	TCPA_HUMAN	T-complex protein 1 subunit alpha	TCP1	4	8	2.16	1.129	0	4.33E-01	2.72E-01	0.053
P09525-[2]	ANXA4_HUMAN	Annexin A4	ANXA4	2	7	3.45	1.133	0	3.85E-01	2.66E-01	0.054
Q9H0U4, Q92928, P62820	RAB1A_HUMAN, RAB1B_HUMAN, RAB1C_HUMAN	Putative Ras-related protein Rab-1C, Ras-related protein Rab-1A, Ras-related protein Rab-1B	RAB1A, RAB1B, RAB1C	1	7	5.44	1.135	0	3.69E-01	2.64E-01	0.055
P04406	G3P_HUMAN	Glyceraldehyde-3-phosphate dehydrogenase	GAPDH	28	501	2.39	1.135	0	3.51E-01	2.64E-01	0.055
O15144	ARPC2_HUMAN	Actin-related protein 2/3 complex subunit 2	ARPC2	6	30	4.33	1.141	0	3.93E-01	2.55E-01	0.057
P07203	GPX1_HUMAN	Glutathione peroxidase 1	GPX1	3	31	4.43	1.141	0	4.09E-01	2.54E-01	0.058
Q01469	FABP5_HUMAN	Fatty acid-binding protein, epidermal	FABP5	4	23	5.19	1.148	0	3.41E-01	2.46E-01	0.060
Q13126	MTAP_HUMAN	S-methyl-5'-thioadenosine phosphorylase	MTAP	2	7	3.89	1.151	0	3.80E-01	2.42E-01	0.061
Q96CT7	CC124_HUMAN	Coiled-coil domain-containing protein 124	CCDC124	1	1	8.07	1.151	0	3.98E-01	2.41E-01	0.061
P15311	EZRI_HUMAN	Ezrin	EZR	3	12	2.22	1.153	0	2.82E-01	2.38E-01	0.062
P34897-[3]	GLYM_HUMAN	Serine hydroxymethyltransferase, mitochondrial	SHMT2	4	13	4.17	1.155	0	3.95E-01	2.35E-01	0.063
Q14116	IL18_HUMAN	Interleukin-18	IL18	1	2	4.15	1.156	0	3.43E-01	2.34E-01	0.063
P00492	HPRT_HUMAN	Hypoxanthine-guanine phosphoribosyltransferase	HPRT1	2	16	4.59	1.157	0	1.78E-01	2.33E-01	0.063
P31948-[2]	STIP1_HUMAN	Stress-induced-phosphoprotein 1	STIP1	3	27	1.29	1.161	0	3.37E-01	2.28E-01	0.065
P04083	ANXA1_HUMAN	Annexin A1	ANXA1	6	45	4.62	1.161	0	3.78E-01	2.28E-01	0.065
P19338	NUCL_HUMAN	Nucleolin	NCL	5	10	1.41	1.169	0	2.89E-01	2.18E-01	0.068
Q14108	SCRB2_HUMAN	Lysosome membrane protein 2	SCARB2	1	1	2.72	1.169	0	4.12E-01	2.17E-01	0.068
O00154-[4,6,7]	BACH_HUMAN	Cytosolic acyl coenzyme A thioester hydrolase	ACOT7	3	8	4.21	1.184	0	4.23E-01	1.99E-01	0.074
P60174	TPIS_HUMAN	Triosephosphate isomerase	TPI1	17	156	5.59	1.187	0	3.73E-01	1.96E-01	0.075
P08670	VIME_HUMAN	Vimentin	VIM	2	19	3.00	1.192	0	2.47E-01	1.90E-01	0.076
P07741	APT_HUMAN	Adenine phosphoribosyltransferase	APRT	4	16	7.22	1.193	0	4.25E-01	1.89E-01	0.077
O43707	ACTN4_HUMAN	Alpha-actinin-4	ACTN4	9	34	1.10	1.197	0	3.21E-01	1.85E-01	0.078
P27797	CALR_HUMAN	Calreticulin	CALR	19	168	1.92	1.199	0	3.35E-01	1.83E-01	0.079
P07195	LDHB_HUMAN	L-lactate dehydrogenase B chain	LDHB	9	38	2.69	1.202	0	3.87E-01	1.79E-01	0.080
Q9BQE3	TBA1C_HUMAN	Tubulin alpha-1C chain	TUBA1C	1	10	3.56	1.204	0	3.04E-01	1.77E-01	0.081
Q9UBQ0	VPS29_HUMAN	Vacuolar protein sorting-associated protein 29	VPS29	1	1	7.69	1.204	0	4.00E-01	1.77E-01	0.081
P53396-[2]	ACLY_HUMAN	ATP-citrate synthase	ACLY	4	25	1.45	1.206	0	4.13E-01	1.75E-01	0.081
P50914	RL14_HUMAN	60S ribosomal protein L14	RPL14	3	27	2.79	1.206	0	3.49E-01	1.75E-01	0.081
P36952	SPB5_HUMAN	Serpin B5	SERPINB5	8	30	5.07	1.210	0	3.43E-01	1.71E-01	0.083
P12236	ADT3_HUMAN	ADP/ATP translocase 3	SLC25A6	5	40	2.68	1.210	0	4.11E-01	1.70E-01	0.083
P34931	HS71L_HUMAN	Heat shock 70 kDa protein 1-like	HSPA1L	2	11	2.03	1.212	0	3.07E-01	1.68E-01	0.084
P07737	PROF1_HUMAN	Profilin-1	PFN1	10	133	17.86	1.212	0	3.42E-01	1.68E-01	0.084
Q96HE7	ERO1A_HUMAN	ERO1-like protein alpha	ERO1L	7	36	1.28	1.213	0	3.95E-01	1.68E-01	0.084
P28070	PSB4_HUMAN	Proteasome subunit beta type-4	PSMB4	4	32	7.58	1.215	0	2.34E-01	1.65E-01	0.085
P12814	ACTN1_HUMAN	Alpha-actinin-1	ACTN1	13	68	1.57	1.216	0	3.47E-01	1.64E-01	0.085
P02647	APOA1_HUMAN	Apolipoprotein A-I	APOA1	3	5	4.49	1.222	0	1.71E-01	1.58E-01	0.087
P83731	RL24_HUMAN	60S ribosomal protein L24	RPL24	1	7	5.73	1.233	0	6.14E-02	1.48E-01	0.091
Q9BUF5	TBB6_HUMAN	Tubulin beta-6 chain	TUBB6	3	19	2.69	1.235	0	3.59E-01	1.46E-01	0.092
Q15181	IPYR_HUMAN	Inorganic pyrophosphatase	PPA1	1	1	4.84	1.240	0	3.15E-01	1.41E-01	0.094
P05109	S10A8_HUMAN	Protein S100-A8	S100A8	2	18	8.60	1.242	0	2.88E-01	1.39E-01	0.094
P11279	LAMP1_HUMAN	Lysosome-associated membrane glycoprotein 1	LAMP1	1	10	3.84	1.248	0	3.28E-01	1.34E-01	0.096
P11766	ADHX_HUMAN	Alcohol dehydrogenase class-3	ADH5	1	1	2.14	1.249	0	3.09E-01	1.34E-01	0.096
P11142	HSP7C_HUMAN	Heat shock cognate 71 kDa protein	HSPA8	16	126	1.39	1.249	0	3.06E-01	1.34E-01	0.097
P04080	CYTB_HUMAN	Cystatin-B	CSTB	1	7	12.24	1.251	0	3.22E-01	1.32E-01	0.097
P26639-[2]	SYTC_HUMAN	Threonine--tRNA ligase, cytoplasmic	TARS	4	11	1.80	1.252	0	3.26E-01	1.30E-01	0.098
O75083	WDR1_HUMAN	WD repeat-containing protein 1	WDR1	1	1	1.65	1.254	0	2.90E-01	1.29E-01	0.098
Q04695	K1C17_HUMAN	Keratin, type I cytoskeletal 17	KRT17	2	14	2.08	1.260	0	2.88E-01	1.24E-01	0.100
Q06830	PRDX1_HUMAN	Peroxiredoxin-1	PRDX1	8	78	5.03	1.260	0	2.89E-01	1.24E-01	0.100
P02788	TRFL_HUMAN	Lactotransferrin	LTF	1	6	1.27	1.261	0	3.02E-01	1.23E-01	0.101
P55072	TERA_HUMAN	Transitional endoplasmic reticulum ATPase	VCP	28	173	0.74	1.266	0	3.11E-01	1.19E-01	0.102
P49368	TCPG_HUMAN	T-complex protein 1 subunit gamma	CCT3	6	19	2.02	1.274	0	3.71E-01	1.13E-01	0.105
Q7Z406-[2,6]	MYH14_HUMAN	Myosin-14	MYH14	1	3	0.30	1.276	0	3.44E-01	1.12E-01	0.106
Q96L21	RL10L_HUMAN	60S ribosomal protein L10-like	RPL10L	1	1	5.14	1.278	0	3.46E-01	1.10E-01	0.106
P61981	1433G_HUMAN	14-3-3 protein gamma	YWHAG	3	17	2.83	1.281	0	1.91E-01	1.08E-01	0.107
P46777	RL5_HUMAN	60S ribosomal protein L5	RPL5	3	11	6.06	1.282	0	3.14E-01	1.08E-01	0.108
P18669	PGAM1_HUMAN	Phosphoglycerate mutase 1	PGAM1	8	78	4.33	1.284	0	3.04E-01	1.06E-01	0.109
P23528	COF1_HUMAN	Cofilin-1	CFL1	14	115	4.82	1.284	0	3.00E-01	1.06E-01	0.109
Q99536	VAT1_HUMAN	Synaptic vesicle membrane protein VAT-1 homolog	VAT1	1	9	3.05	1.292	0	3.19E-01	1.00E-01	0.111
P62258	1433E_HUMAN	14-3-3 protein epsilon	YWHAE	9	28	3.14	1.303	0	1.74E-01	9.30E-02	0.115
P68371	TBB4B_HUMAN	Tubulin beta-4B chain	TUBB4B	1	5	2.02	1.304	0	3.88E-01	9.21E-02	0.115
P22307	NLTP_HUMAN	Non-specific lipid-transfer protein	SCP2	1	3	1.46	1.306	0	3.39E-01	9.08E-02	0.116
P32119	PRDX2_HUMAN	Peroxiredoxin-2	PRDX2	3	29	5.56	1.310	0	2.91E-01	8.87E-02	0.117
P62249	RS16_HUMAN	40S ribosomal protein S16	RPS16	1	1	7.53	1.311	0	2.65E-01	8.83E-02	0.117
P59998-[2,3]	ARPC4_HUMAN	Actin-related protein 2/3 complex subunit 4	ARPC4	4	47	4.76	1.315	0	2.81E-01	8.59E-02	0.119
P07910-[2,4]	HNRPC_HUMAN	Heterogeneous nuclear ribonucleoproteins C1/C2	HNRNPC	2	3	2.94	1.317	0	3.31E-01	8.45E-02	0.120
Q16658	FSCN1_HUMAN	Fascin	FSCN1	11	75	3.65	1.319	0	2.11E-01	8.34E-02	0.120
P09382	LEG1_HUMAN	Galectin-1	LGALS1	8	126	11.85	1.324	0	2.76E-01	8.05E-02	0.122
P60981	DEST_HUMAN	Destrin	DSTN	4	22	3.64	1.324	0	2.90E-01	8.03E-02	0.122
O00148, Q13838-[2]	DX39A_HUMAN, DX39B_HUMAN	ATP-dependent RNA helicase DDX39A, Spliceosome RNA helicase DDX39B	DDX39A, DDX39B	3	19	2.49	1.325	0	2.48E-01	7.99E-02	0.122
P11021	GRP78_HUMAN	78 kDa glucose-regulated protein	HSPA5	38	454	2.29	1.326	0	2.79E-01	7.96E-02	0.122
P68402	PA1B2_HUMAN	Platelet-activating factor acetylhydrolase IB subunit beta	PAFAH1B2	1	11	3.93	1.329	0	2.66E-01	7.74E-02	0.124
P22314-[2]	UBA1_HUMAN	Ubiquitin-like modifier-activating enzyme 1	UBA1	5	15	1.32	1.334	0	3.27E-01	7.51E-02	0.125
P04181	OAT_HUMAN	Ornithine aminotransferase, mitochondrial	OAT	11	102	3.64	1.334	0	3.00E-01	7.49E-02	0.125
P78371	TCPB_HUMAN	T-complex protein 1 subunit beta	CCT2	6	49	2.80	1.338	0	3.02E-01	7.29E-02	0.126
P60903	S10AA_HUMAN	Protein S100-A10	S100A10	4	28	17.53	1.343	0	2.92E-01	7.06E-02	0.128
Q9Y4L1	HYOU1_HUMAN	Hypoxia up-regulated protein 1	HYOU1	1	2	1.30	1.347	0	3.25E-01	6.85E-02	0.129
P07339	CATD_HUMAN	Cathepsin D	CTSD	9	89	3.16	1.350	0	2.88E-01	6.68E-02	0.130
P18621	RL17_HUMAN	60S ribosomal protein L17	RPL17	1	1	4.35	1.355	0	2.38E-01	6.46E-02	0.132
Q8N1F8	S11IP_HUMAN	Serine/threonine-protein kinase 11-interacting protein	STK11IP	2	5	0.55	1.360	0	2.84E-01	6.24E-02	0.133
P25705	ATPA_HUMAN	ATP synthase subunit alpha, mitochondrial	ATP5A1	16	101	3.98	1.363	0	2.44E-01	6.08E-02	0.135
P47895	AL1A3_HUMAN	Aldehyde dehydrogenase family 1 member A3	ALDH1A3	8	70	2.15	1.368	0	2.10E-01	5.89E-02	0.136
P30040	ERP29_HUMAN	Endoplasmic reticulum resident protein 29	ERP29	3	21	3.83	1.370	0	2.91E-01	5.78E-02	0.137
Q96MS3-[2,3]	GL1D1_HUMAN	Glycosyltransferase 1 domain-containing protein 1	GLT1D1	1	3	1.73	1.373	0	3.00E-01	5.66E-02	0.138
P29401-[2]	TKT_HUMAN	Transketolase	TKT	17	139	0.96	1.376	0	2.61E-01	5.55E-02	0.139
Q14839-[2]	CHD4_HUMAN	Chromodomain-helicase-DNA-binding protein 4	CHD4	2	7	0.47	1.382	0	8.12E-06	5.30E-02	0.141
P13746-2	1A11_HUMAN	HLA class I histocompatibility antigen, A-11 alpha chain	HLA-A	1	2	3.56	1.383	0	2.18E-01	5.25E-02	0.141
P06737-[2]	PYGL_HUMAN	Glycogen phosphorylase, liver form	PYGL	2	32	2.01	1.391	0	2.18E-01	4.95E-02	0.143
P27824-[2]	CALX_HUMAN	Calnexin	CANX	6	30	1.69	1.397	0	2.48E-01	4.75E-02	0.145
P07237	PDIA1_HUMAN	Protein disulfide-isomerase	P4HB	26	162	2.95	1.398	0	2.46E-01	4.71E-02	0.146
Q9UHB6	LIMA1_HUMAN	LIM domain and actin-binding protein 1	LIMA1	1	1	1.71	1.399	0	2.36E-01	4.69E-02	0.146
P30041	PRDX6_HUMAN	Peroxiredoxin-6	PRDX6	6	44	3.12	1.401	0	1.90E-01	4.62E-02	0.146
P40925-[3]	MDHC_HUMAN	Malate dehydrogenase, cytoplasmic	MDH1	4	49	3.59	1.422	0	2.45E-01	3.93E-02	0.153
P00505	AATM_HUMAN	Aspartate aminotransferase, mitochondrial	GOT2	11	73	2.33	1.423	0	2.15E-01	3.91E-02	0.153
P09972	ALDOC_HUMAN	Fructose-bisphosphate aldolase C	ALDOC	1	1	6.32	1.431	0	2.03E-01	3.68E-02	0.156
Q14204	DYHC1_HUMAN	Cytoplasmic dynein 1 heavy chain 1	DYNC1H1	3	5	0.13	1.432	0	1.65E-01	3.64E-02	0.156
P61224	RAP1B_HUMAN	Ras-related protein Rap-1b	RAP1B	1	22	6.52	1.432	0	1.36E-01	3.64E-02	0.156
P61586	RHOA_HUMAN	Transforming protein RhoA	RHOA	3	11	8.81	1.437	0	1.38E-01	3.50E-02	0.158
P38646	GRP75_HUMAN	Stress-70 protein, mitochondrial	HSPA9	10	90	1.62	1.446	0	2.56E-01	3.26E-02	0.160
P63261	ACTG_HUMAN	Actin, cytoplasmic 2	ACTG1	1	40	4.27	1.449	0	2.13E-01	3.19E-02	0.161
Q5BKX8	MURC_HUMAN	Muscle-related coiled-coil protein	MURC	1	1	2.47	1.451	0	2.21E-01	3.15E-02	0.162
P26373	RL13_HUMAN	60S ribosomal protein L13	RPL13	4	15	4.27	1.455	1	2.54E-03	3.04E-02	0.163
P13639	EF2_HUMAN	Elongation factor 2	EEF2	25	202	2.80	1.458	0	1.82E-01	2.98E-02	0.164
Q07065	CKAP4_HUMAN	Cytoskeleton-associated protein 4	CKAP4	1	2	2.66	1.458	0	2.62E-01	2.97E-02	0.164
P61163	ACTZ_HUMAN	Alpha-centractin	ACTR1A	2	4	4.52	1.461	0	2.49E-01	2.91E-02	0.165
P62847-4	RS24_HUMAN	40S ribosomal protein S24	RPS24	1	2	9.02	1.475	0	2.79E-01	2.62E-02	0.169
P01861	IGHG4_HUMAN	Ig gamma-4 chain C region	IGHG4	1	4	4.89	1.482	1	2.00E-02	2.46E-02	0.171
P20618	PSB1_HUMAN	Proteasome subunit beta type-1	PSMB1	4	14	5.81	1.482	0	2.37E-01	2.46E-02	0.171
P05386	RLA1_HUMAN	60S acidic ribosomal protein P1	RPLP1	2	13	14.04	1.486	0	2.56E-01	2.40E-02	0.172
Q16698	DECR_HUMAN	2,4-dienoyl-CoA reductase, mitochondrial	DECR1	1	4	3.28	1.486	0	3.20E-01	2.39E-02	0.172
P17655	CAN2_HUMAN	Calpain-2 catalytic subunit	CAPN2	5	37	1.43	1.489	0	2.32E-01	2.34E-02	0.173
P11387	TOP1_HUMAN	DNA topoisomerase 1	TOP1	1	1	0.92	1.502	0	1.51E-01	2.10E-02	0.177
P08865	RSSA_HUMAN	40S ribosomal protein SA	RPSA	7	33	4.41	1.505	0	1.48E-01	2.05E-02	0.178
Q13404-7	UB2V1_HUMAN	Ubiquitin-conjugating enzyme E2 variant 1	UBE2V1	1	8	6.80	1.509	0	1.33E-01	1.99E-02	0.179
P13645	K1C10_HUMAN	Keratin, type I cytoskeletal 10	KRT10	3	5	3.60	1.510	0	2.09E-01	1.98E-02	0.179
Q8NBS9-[2]	TXND5_HUMAN	Thioredoxin domain-containing protein 5	TXNDC5	2	15	2.08	1.510	0	2.01E-01	1.97E-02	0.179
Q13200	PSMD2_HUMAN	26S proteasome non-ATPase regulatory subunit 2	PSMD2	1	5	1.65	1.511	1	4.13E-02	1.96E-02	0.179
P60709	ACTB_HUMAN	Actin, cytoplasmic 1	ACTB	1	25	3.47	1.515	0	2.07E-01	1.90E-02	0.180
Q06430	GNT2B_HUMAN	N-acetyllactosaminide beta-1,6-N-acetylglucosaminyl-transferase, isoform B	GCNT2	1	1	3.50	1.516	0	1.36E-01	1.88E-02	0.181
P05120	PAI2_HUMAN	Plasminogen activator inhibitor 2	SERPINB2	5	10	1.93	1.525	0	1.17E-01	1.75E-02	0.183
P31150	GDIA_HUMAN	Rab GDP dissociation inhibitor alpha	GDI1	1	5	4.25	1.528	0	1.75E-01	1.71E-02	0.184
P04792	HSPB1_HUMAN	Heat shock protein beta-1	HSPB1	13	157	9.27	1.540	0	2.02E-01	1.55E-02	0.188
P23284	PPIB_HUMAN	Peptidyl-prolyl cis-trans isomerase B	PPIB	3	23	5.09	1.543	0	1.71E-01	1.51E-02	0.188
P23526	SAHH_HUMAN	Adenosylhomocysteinase	AHCY	3	33	2.08	1.545	0	1.72E-01	1.49E-02	0.189
P48637	GSHB_HUMAN	Glutathione synthetase	GSS	2	2	1.48	1.548	0	2.29E-01	1.45E-02	0.190
P13489	RINI_HUMAN	Ribonuclease inhibitor	RNH1	2	6	3.04	1.553	0	2.40E-01	1.40E-02	0.191
O00299	CLIC1_HUMAN	Chloride intracellular channel protein 1	CLIC1	3	24	3.73	1.557	0	2.10E-01	1.35E-02	0.192
P12429	ANXA3_HUMAN	Annexin A3	ANXA3	7	46	3.41	1.564	0	2.29E-01	1.27E-02	0.194
P61247	RS3A_HUMAN	40S ribosomal protein S3a	RPS3A	5	12	3.79	1.568	0	1.51E-01	1.23E-02	0.195
Q9BVK6	TMED9_HUMAN	Transmembrane emp24 domain-containing protein 9	TMED9	1	3	4.26	1.579	0	1.70E-01	1.13E-02	0.198
Q16531	DDB1_HUMAN	DNA damage-binding protein 1	DDB1	1	1	1.14	1.579	0	1.58E-01	1.12E-02	0.199
Q15084-[2-5]	PDIA6_HUMAN	Protein disulfide-isomerase A6	PDIA6	5	58	3.41	1.581	0	1.41E-01	1.10E-02	0.199
P13797	PLST_HUMAN	Plastin-3	PLS3	5	13	1.90	1.584	1	2.13E-02	1.08E-02	0.200
P06744-[2]	G6PI_HUMAN	Glucose-6-phosphate isomerase	GPI	5	42	2.69	1.584	0	1.31E-01	1.08E-02	0.200
P06576	ATPB_HUMAN	ATP synthase subunit beta, mitochondrial	ATP5B	21	214	2.65	1.589	0	1.69E-01	1.04E-02	0.201
P31947	1433S_HUMAN	14-3-3 protein sigma	SFN	15	189	3.63	1.592	0	1.96E-01	1.01E-02	0.202
O15145	ARPC3_HUMAN	Actin-related protein 2/3 complex subunit 3	ARPC3	2	27	6.18	1.617	0	1.15E-01	8.19E-03	0.209
Q9NR12-[2]	PDLI7_HUMAN	PDZ and LIM domain protein 7	PDLIM7	3	5	2.63	1.620	0	1.41E-01	7.98E-03	0.209
P42574	CASP3_HUMAN	Caspase-3	CASP3	2	16	2.17	1.626	0	2.41E-01	7.56E-03	0.211
O15230	LAMA5_HUMAN	Laminin subunit alpha-5	LAMA5	3	3	0.19	1.630	0	1.94E-01	7.31E-03	0.212
P49721	PSB2_HUMAN	Proteasome subunit beta type-2	PSMB2	1	22	5.47	1.635	1	1.82E-03	7.01E-03	0.214
P63104	1433Z_HUMAN	14-3-3 protein zeta/delta	YWHAZ	9	101	2.45	1.642	0	1.18E-01	6.61E-03	0.215
P40926	MDHM_HUMAN	Malate dehydrogenase, mitochondrial	MDH2	11	86	5.62	1.643	0	1.68E-01	6.55E-03	0.216
P29034	S10A2_HUMAN	Protein S100-A2	S100A2	12	241	16.33	1.647	0	2.41E-01	6.34E-03	0.217
P30044-[2]	PRDX5_HUMAN	Peroxiredoxin-5, mitochondrial	PRDX5	4	43	7.94	1.677	0	1.67E-01	4.90E-03	0.225
P04632	CPNS1_HUMAN	Calpain small subunit 1	CAPNS1	7	65	7.09	1.687	0	1.93E-01	4.48E-03	0.227
P21980	TGM2_HUMAN	Protein-glutamine gamma-glutamyltransferase 2	TGM2	3	20	3.06	1.691	0	6.94E-02	4.35E-03	0.228
P48643	TCPE_HUMAN	T-complex protein 1 subunit epsilon	CCT5	6	35	1.29	1.696	1	2.17E-03	4.15E-03	0.229
P14618	KPYM_HUMAN	Pyruvate kinase PKM	PKM	34	329	4.33	1.698	0	1.40E-01	4.09E-03	0.230
Q16563	SYPL1_HUMAN	Synaptophysin-like protein 1	SYPL1	1	1	4.25	1.709	0	1.89E-01	3.70E-03	0.233
O75874	IDHC_HUMAN	Isocitrate dehydrogenase [NADP] cytoplasmic	IDH1	2	3	4.11	1.709	0	2.52E-01	3.70E-03	0.233
P47929	LEG7_HUMAN	Galectin-7	LGALS7	9	63	10.29	1.726	0	9.99E-02	3.21E-03	0.237
P10809	CH60_HUMAN	60 kDa heat shock protein, mitochondrial	HSPD1	14	84	2.09	1.726	0	1.66E-01	3.19E-03	0.237
P54274-[2]	TERF1_HUMAN	Telomeric repeat-binding factor 1	TERF1	2	2	2.05	1.736	0	1.50E-01	2.93E-03	0.240
P02545-[3-5]	LMNA_HUMAN	Prelamin-A/C [Cleaved into: Lamin-A/C	LMNA	3	4	1.36	1.766	0	1.73E-01	2.24E-03	0.247
Q13561	DCTN2_HUMAN	Dynactin subunit 2	DCTN2	1	1	3.49	1.809	0	1.62E-01	1.53E-03	0.257
P62826	RAN_HUMAN	GTP-binding nuclear protein Ran	RAN	5	19	5.09	1.809	0	2.13E-01	1.53E-03	0.257
P11216	PYGB_HUMAN	Glycogen phosphorylase, brain form	PYGB	16	162	1.78	1.824	0	1.85E-01	1.34E-03	0.261
Q07021	C1QBP_HUMAN	Complement component 1 Q subcomponent-binding protein, mitochondrial	C1QBP	1	1	4.96	1.830	0	6.36E-02	1.27E-03	0.263
Q04760-[2]	LGUL_HUMAN	Lactoylglutathione lyase	GLO1	3	29	5.43	1.864	0	5.65E-02	9.31E-04	0.270
P29728	OAS2_HUMAN	2'-5'-oligoadenylate synthase 2	OAS2	2	3	0.83	1.888	0	8.30E-02	7.50E-04	0.276
P11166	GTR1_HUMAN	Solute carrier family 2, facilitated glucose transporter member 1	SLC2A1	4	46	2.03	1.891	1	2.60E-02	7.28E-04	0.277
P04350	TBB4A_HUMAN	Tubulin beta-4A chain	TUBB4A	1	3	5.63	1.895	0	8.63E-02	7.00E-04	0.278
P00558-[2]	PGK1_HUMAN	Phosphoglycerate kinase 1	PGK1	7	70	4.56	1.912	0	1.34E-01	5.99E-04	0.282
P04075	ALDOA_HUMAN	Fructose-bisphosphate aldolase A	ALDOA	14	145	2.47	1.928	0	9.43E-02	5.17E-04	0.285
P07437	TBB5_HUMAN	Tubulin beta chain	TUBB	3	29	2.25	1.934	0	7.86E-02	4.92E-04	0.286
P52597	HNRPF_HUMAN	Heterogeneous nuclear ribonucleoprotein F	HNRNPF	1	3	4.10	1.950	0	6.82E-02	4.23E-04	0.290
Q9BPX5	ARP5L_HUMAN	Actin-related protein 2/3 complex subunit 5-like protein	ARPC5L	1	1	7.84	1.972	0	1.31E-01	3.46E-04	0.295
P61158	ARP3_HUMAN	Actin-related protein 3	ACTR3	6	26	2.63	2.040	1	3.21E-02	1.84E-04	0.310
Q92598-[2-4]	HS105_HUMAN	Heat shock protein 105 kDa	HSPH1	3	4	1.75	2.040	0	8.11E-02	1.83E-04	0.310
P68366	TBA4A_HUMAN	Tubulin alpha-4A chain	TUBA4A	2	20	3.57	2.090	0	1.00E-01	1.15E-04	0.320
P07355-2	ANXA2_HUMAN	Annexin A2	ANXA2	27	628	2.06	2.101	0	1.55E-01	1.04E-04	0.322
P10155	RO60_HUMAN	60 kDa SS-A/Ro ribonucleoprotein	TROVE2	1	2	2.42	2.108	0	1.63E-01	9.68E-05	0.324
P56134	ATPK_HUMAN	ATP synthase subunit f, mitochondrial	ATP5J2	1	2	11.70	2.148	0	1.74E-01	6.65E-05	0.332
P04844	RPN2_HUMAN	Dolichyl-diphosphooligosaccharide--protein glycosyltransferase subunit 2	RPN2	1	1	1.90	2.172	0	1.14E-01	5.30E-05	0.337
P04843	RPN1_HUMAN	Dolichyl-diphosphooligosaccharide--protein glycosyltransferase subunit 1	RPN1	1	1	2.47	2.210	0	8.08E-02	3.71E-05	0.344
O60635	TSN1_HUMAN	Tetraspanin-1	TSPAN1	1	1	5.39	2.265	0	1.26E-01	2.20E-05	0.355
P09211	GSTP1_HUMAN	Glutathione S-transferase P	GSTP1	10	117	7.62	2.308	1	3.65E-02	1.47E-05	0.363
O00754-[2]	MA2B1_HUMAN	Lysosomal alpha-mannosidase	MAN2B1	2	4	1.09	2.444	0	9.41E-02	3.99E-06	0.388
P78417	GSTO1_HUMAN	Glutathione S-transferase omega-1	GSTO1	4	25	5.81	2.482	1	2.89E-10	2.77E-06	0.395
P51148	RAB5C_HUMAN	Ras-related protein Rab-5C	RAB5C	1	1	4.63	2.518	0	6.00E-02	1.97E-06	0.401
P06865	HEXA_HUMAN	Beta-hexosaminidase subunit alpha	HEXA	1	1	2.08	2.539	0	7.44E-02	1.61E-06	0.405
P13667	PDIA4_HUMAN	Protein disulfide-isomerase A4	PDIA4	3	4	1.09	2.633	1	2.99E-02	6.60E-07	0.420
P62277	RS13_HUMAN	40S ribosomal protein S13	RPS13	1	1	7.95	2.638	1	2.88E-02	6.27E-07	0.421
Q13509	TBB3_HUMAN	Tubulin beta-3 chain	TUBB3	4	19	4.00	2.664	1	4.21E-04	4.87E-07	0.426
P30048	PRDX3_HUMAN	Thioredoxin-dependent peroxide reductase, mitochondrial	PRDX3	1	1	5.47	2.769	1	3.86E-02	1.80E-07	0.442
Q56VL3	OCAD2_HUMAN	OCIA domain-containing protein 2	OCIAD2	1	1	5.84	2.947	0	5.10E-02	3.33E-08	0.469
Q01813-[2]	PFKAP_HUMAN	ATP-dependent 6-phosphofructokinase, platelet type	PFKP	2	3	2.68	3.116	1	3.23E-02	6.75E-09	0.494
Q9UL46	PSME2_HUMAN	Proteasome activator complex subunit 2	PSME2	1	1	5.44	3.169	0	6.49E-02	4.13E-09	0.501
P50213	IDH3A_HUMAN	Isocitrate dehydrogenase [NAD] subunit alpha, mitochondrial	IDH3A	3	3	2.19	3.239	1	6.67E-03	2.14E-09	0.510
Q9Y6N5	SQRD_HUMAN	Sulfide:quinone oxidoreductase, mitochondrial	SQRDL	1	2	2.22	3.487	1	8.97E-03	2.17E-10	0.543
P38606-[2]	VATA_HUMAN	V-type proton ATPase catalytic subunit A	ATP6V1A	2	2	2.43	4.833	1	1.38E-02	1.75E-15	0.684
B) Proteins identified without quantitative data
Accession	ID	Description	Gene	Peptide Count	Spectral Count	Sequence Coverage
P68032, P68133	ACTC_HUMAN, ACTS_HUMAN	Actin, alpha cardiac muscle 1, Actin, alpha skeletal muscle	ACTA1, ACTC1	2	32	2.39
P35609-[2]	ACTN2_HUMAN	Alpha-actinin-2	ACTN2	1	1	1.34
Q08043	ACTN3_HUMAN	Alpha-actinin-3	ACTN3	1	2	0.89
P55263-[2,4]	ADK_HUMAN	Adenosine kinase	ADK	3	14	2.21
P49419	AL7A1_HUMAN	Alpha-aminoadipic semialdehyde dehydrogenase	ALDH7A1	1	1	2.04
P13928, Q5T2P8-[2], Q5VT79	ANXA8_HUMAN, AXA81_HUMAN	Annexin A8, Annexin A8-like protein 1, Merged into P13928.	ANXA8, ANXA8L1	4	46
O14497-[2,3]	ARI1A_HUMAN	AT-rich interactive domain-containing protein 1A	ARID1A	1	1	0.26
P53004	BIEA_HUMAN	Biliverdin reductase A	BLVRA	2	4	3.38
P16152	CBR1_HUMAN	Carbonyl reductase [NADPH] 1	CBR1	3	11	4.69
Q9H7U1-[2,3]	CCSE2_HUMAN	Serine-rich coiled-coil domain-containing protein 2	CCSER2	2	2	1.44
P12532	KCRU_HUMAN	Creatine kinase U-type, mitochondrial	CKMT1A	9	48	3.12
P30085	KCY_HUMAN	UMP-CMP kinase	CMPK1	1	1	4.08
Q1MSJ5-[1,2]	CSPP1_HUMAN	Centrosome and spindle pole-associated protein 1	CSPP1	1	1	0.56
Q14247-2	SRC8_HUMAN	Src substrate cortactin	CTTN	1	1	2.00
P14868-[2]	SYDC_HUMAN	Aspartate--tRNA ligase, cytoplasmic	DARS	2	5	2.40
P24534	EF1B_HUMAN	Elongation factor 1-beta	EEF1B2	2	6	4.00
P60842	IF4A1_HUMAN	Eukaryotic initiation factor 4A-I	EIF4A1	6	39	1.97
Q96TA1	NIBL1_HUMAN	Niban-like protein 1	FAM129B	1	1	1.47
P14324	FPPS_HUMAN	Farnesyl pyrophosphate synthase	FDPS	1	1	2.86
P00367	DHE3_HUMAN	Glutamate dehydrogenase 1, mitochondrial	GLUD1	5	19	2.87
Q9UBQ7	GRHPR_HUMAN	Glyoxylate reductase/hydroxypyruvate reductase	GRHPR	1	1	4.88
A4D1B5-[4]	GSAP_HUMAN	Gamma-secretase-activating protein	GSAP	1	1	0.70
O75367	H2AY_HUMAN	Core histone macro-H2A.1	H2AFY	1	1	2.69
P0C0S8, Q96KK5, Q93077, Q99878, Q6FI13	H2A1_HUMAN, H2A1C_HUMAN, H2A1H_HUMAN, H2A1J_HUMAN, H2A2A_HUMAN	Histone H2A type 1, Histone H2A type 1-C, Histone H2A type 1-H, Histone H2A type 1-J, Histone H2A type 2-A	HIST1H2AC, HIST1H2AG, HIST1H2AH, HIST1H2AJ, HIST2H2AA3	6	89	9.42
P68431, Q16695, Q71DI3	H31_HUMAN, H31T_HUMAN, H32_HUMAN	Histone H3.1, Histone H3.1t, Histone H3.2	HIST1H3A, HIST2H3A;, HIST3H3	8	67	5.39
P17096-2	HMGA1_HUMAN	High mobility group protein HMG-I/HMG-Y	HMGA1	1	2	7.48
Q99729-[2-4]	ROAA_HUMAN	Heterogeneous nuclear ribonucleoprotein A/B	HNRNPAB	2	4	2.41
O14979-[2,3]	HNRDL_HUMAN	Heterogeneous nuclear ribonucleoprotein D-like	HNRNPDL	1	1	1.90
Q00839-[2]	HNRPU_HUMAN	Heterogeneous nuclear ribonucleoprotein U	HNRNPU	2	3	2.18
P0DMV9	HS71B_HUMAN	Heat shock 70 kDa protein 1B	HSPA1B	2	11	1.09
P17066	HSP76_HUMAN	Heat shock 70 kDa protein 6	HSPA6			1.09
P01834	IGKC_HUMAN	Ig kappa chain C region	IGKC	1	4	15.09
Q8NI35-[2-5]	INADL_HUMAN	InaD-like protein	INADL	2	7	0.33
O00410	IPO5_HUMAN	Importin-5	IPO5	1	1	0.82
P46940	IQGA1_HUMAN	Ras GTPase-activating-like protein IQGAP1	IQGAP1	2	2	0.42
P26006-[1]	ITA3_HUMAN	Integrin alpha-3	ITGA3	2	3	0.86
Q15046-[2]	SYK_HUMAN	Lysine--tRNA ligase	KARS	2	8	1.17
P02538	K2C6A_HUMAN	Keratin, type II cytoskeletal 6A	KRT6A	6	41	2.13
P08729	K2C7_HUMAN	Keratin, type II cytoskeletal 7	KRT7	1	1	1.92
P35527	K1C9_HUMAN	Keratin, type I cytoskeletal 9	KRT9	1	1	5.14
P00338-[3]	LDHA_HUMAN	L-lactate dehydrogenase A chain	LDHA	23	213	3.31
O75608	LYPA1_HUMAN	Acyl-protein thioesterase 1	LYPLA1	1	1	6.09
O43795-[2]	MYO1B_HUMAN	Unconventional myosin-Ib	MYO1B	2	2	0.53
Q9NQR4	NIT2_HUMAN	Omega-amidase NIT2	NIT2	2	2	3.99
P22392-2	NDKB_HUMAN	Nucleoside diphosphate kinase B	NME2	12	148	5.26
Q9Y5E9	PCDBE_HUMAN	Protocadherin beta-14	PCDHB14	1	1	1.13
O43175	SERA_HUMAN	D-3-phosphoglycerate dehydrogenase	PHGDH	3	11	4.13
P30613-[2]	KPYR_HUMAN	Pyruvate kinase PKLR	PKLR	1	1	2.61
P50336	PPOX_HUMAN	Protoporphyrinogen oxidase	PPOX			1.26
P62136-[2]	PP1A_HUMAN	Serine/threonine-protein phosphatase PP1-alpha catalytic subunit	PPP1CA	1	1	4.24
P26599	PTBP1_HUMAN	Polypyrimidine tract-binding protein 1	PTBP1	1	1	4.33
P11217	PYGM_HUMAN	Glycogen phosphorylase, muscle form	PYGM	1	2	2.02
P18124	RL7_HUMAN	60S ribosomal protein L7	RPL7	2	6	2.42
P46783	RS10_HUMAN	40S ribosomal protein S10	RPS10	3	7	8.48
P62244	RS15A_HUMAN	40S ribosomal protein S15a	RPS15A	3	6	6.92
P46782	RS5_HUMAN	40S ribosomal protein S5 [Cleaved into: 40S ribosomal protein S5, N-terminally processed]	RPS5	1	1	6.37
Q9BW04	SARG_HUMAN	Specifically androgen-regulated gene protein	SARG	1	1	2.66
Q15019-3	SEPT2_HUMAN	Septin-2	SEPT2	1	1	4.43
Q16181-2	SEPT7_HUMAN	Septin-7	SEPT7	1	1	3.89
P07951	TPM2_HUMAN	Tropomyosin beta chain	TPM2			3.17
P06753	TPM3_HUMAN	Tropomyosin alpha-3 chain	TPM3			3.86
P06753-5	TPM3_HUMAN	Tropomyosin alpha-3 chain	TPM3			3.86
O94972-3	TRI37_HUMAN	E3 ubiquitin-protein ligase TRIM37	TRIM37	2	2	1.35
Q71U36-[2]	TBA1A_HUMAN	Tubulin alpha-1A chain	TUBA1A			1.33
P68363	TBA1B_HUMAN	Tubulin alpha-1B chain	TUBA1B			3.77
Q6PEY2	TBA3E_HUMAN	Tubulin alpha-3E chain	TUBA3E	1	1	4.00
Q9NY65-[2]	TBA8_HUMAN	Tubulin alpha-8 chain	TUBA8			2.00
Q9BVA1	TBB2B_HUMAN	Tubulin beta-2B chain	TUBB2B	1	16	4.04
Q16881-3	TRXR1_HUMAN	Thioredoxin reductase 1, cytoplasmic	TXNRD1	1	2	2.31
Q14157-[1,3-5]	UBP2L_HUMAN	Ubiquitin-associated protein 2-like	UBAP2L	2	2	1.84
Q9UMX0	UBQL1_HUMAN	Ubiquilin-1	UBQLN1	3	22	2.72
